# Supplementary material for: Characterisation of NPFF-expressing neurons in the superficial dorsal horn of the mouse spinal cord
Source: PubMed Central journal article supplement (PMC10090074; doi:10.1038/s41598-023-32720-3), 2023-04-11
Supplement: 41598_2023_32720_MOESM1_ESM.pdf [file 41598_2023_32720_MOESM1_ESM.pdf]

# **Characterisation of NPF-expressing neurons in the superficial dorsal horn of the mouse spinal cord**

Raphaëlle Quillet<sup>1\*,3</sup>, Allen C. Dickie<sup>1,3</sup>, Erika Polgár<sup>1</sup>, Maria Gutierrez-Mecinas<sup>1</sup>, Andrew M. Bell<sup>1</sup>, Luca Goffin<sup>1</sup>, Masahiko Watanabe<sup>2</sup> and Andrew J. Todd<sup>1\*</sup>

<sup>1</sup>School of Psychology and Neuroscience, Sir James Black Building, University of Glasgow, Glasgow, G12 8QQ, UK; <sup>2</sup>Department of Anatomy, Hokkaido University School of Medicine, Sapporo 060-8638, Japan

<sup>3</sup>These authors contributed equally: Raphaëlle Quillet and Allen Dickie

Number of words in abstract: 198

main text: 4513

online methods: 3075

Number of references: 64

Number of figures: 11 (plus 3 supplementary)

\*Correspondence:

Raphaëlle Quillet, Spinal Cord Group, Sir James Black Building, University of Glasgow, Glasgow, G12 8QQ, UK. Email: [raphaëlle.quillet@glasgow.ac.uk](mailto:raphaëlle.quillet@glasgow.ac.uk)

or

Andrew Todd, Spinal Cord Group, Sir James Black Building, University of Glasgow, Glasgow, G12 8QQ, UK. Email: [andrew.todd@glasgow.ac.uk](mailto:andrew.todd@glasgow.ac.uk)

Fig S1

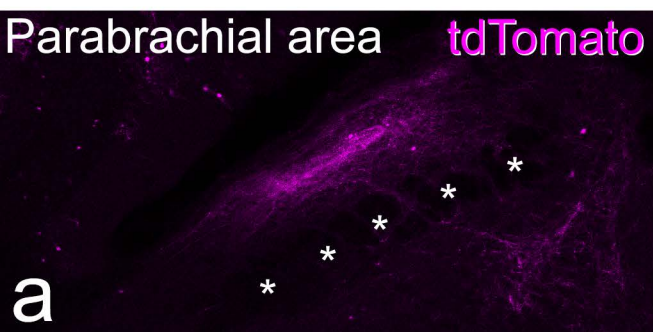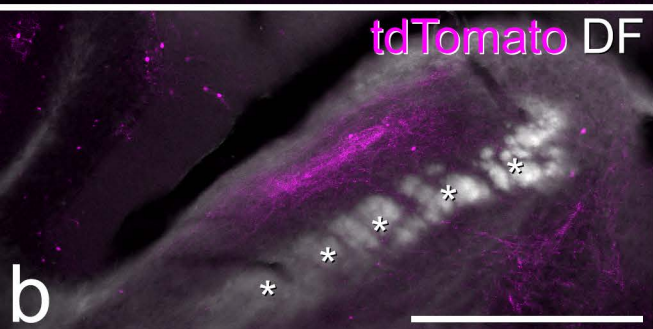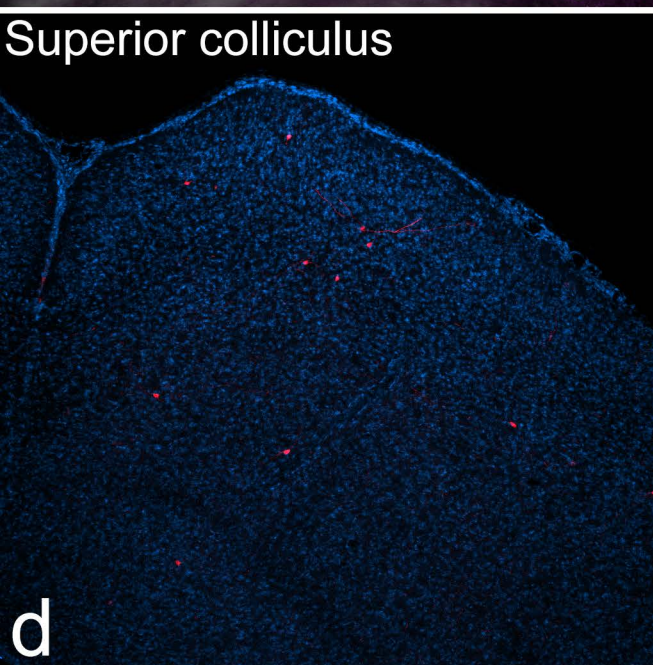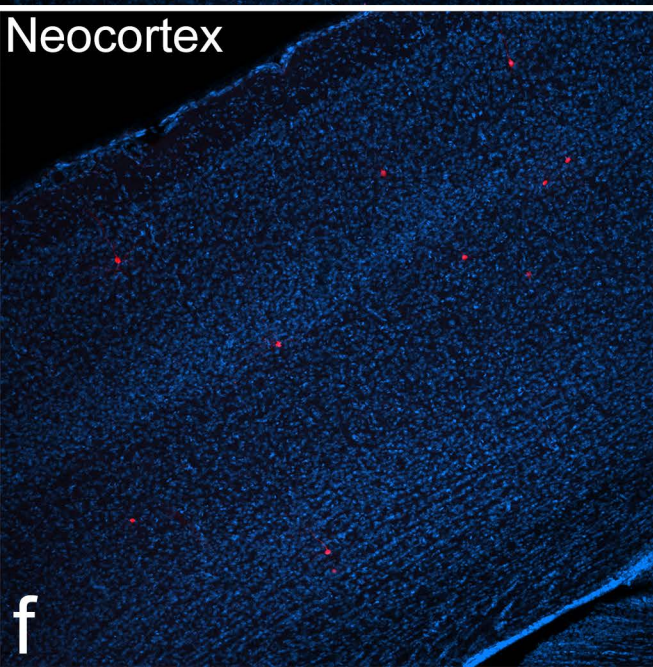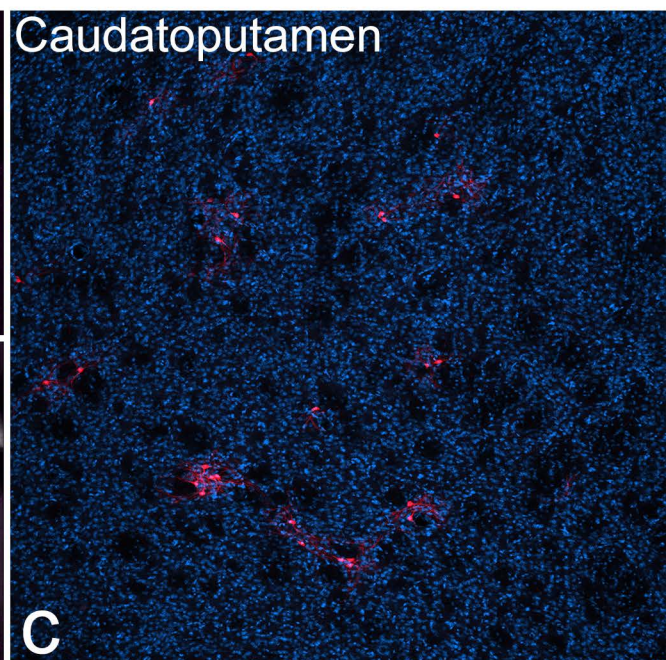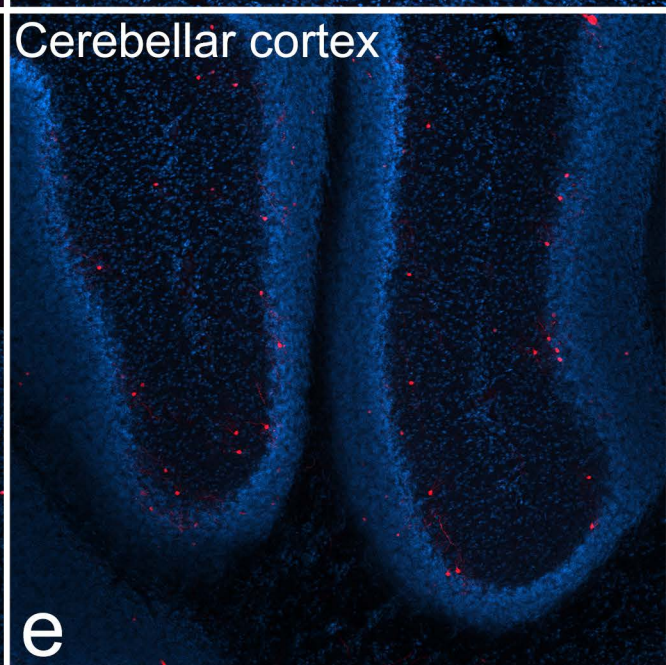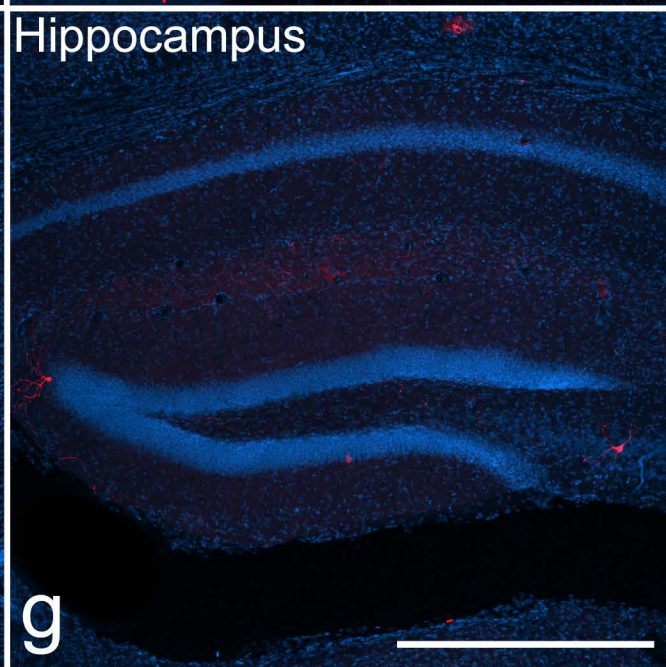

Fig S2

tdTomato GFP

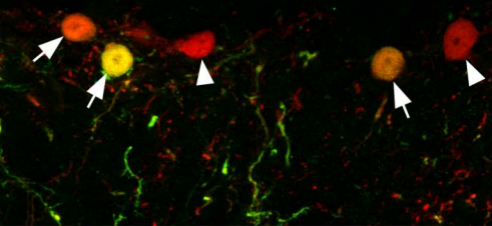

Pax2

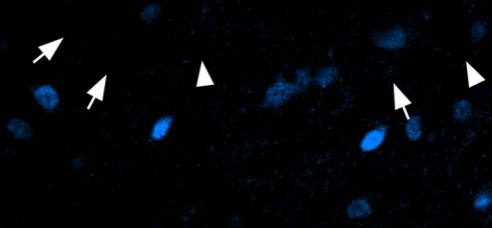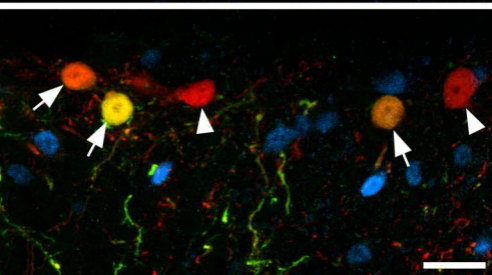

Fig S3

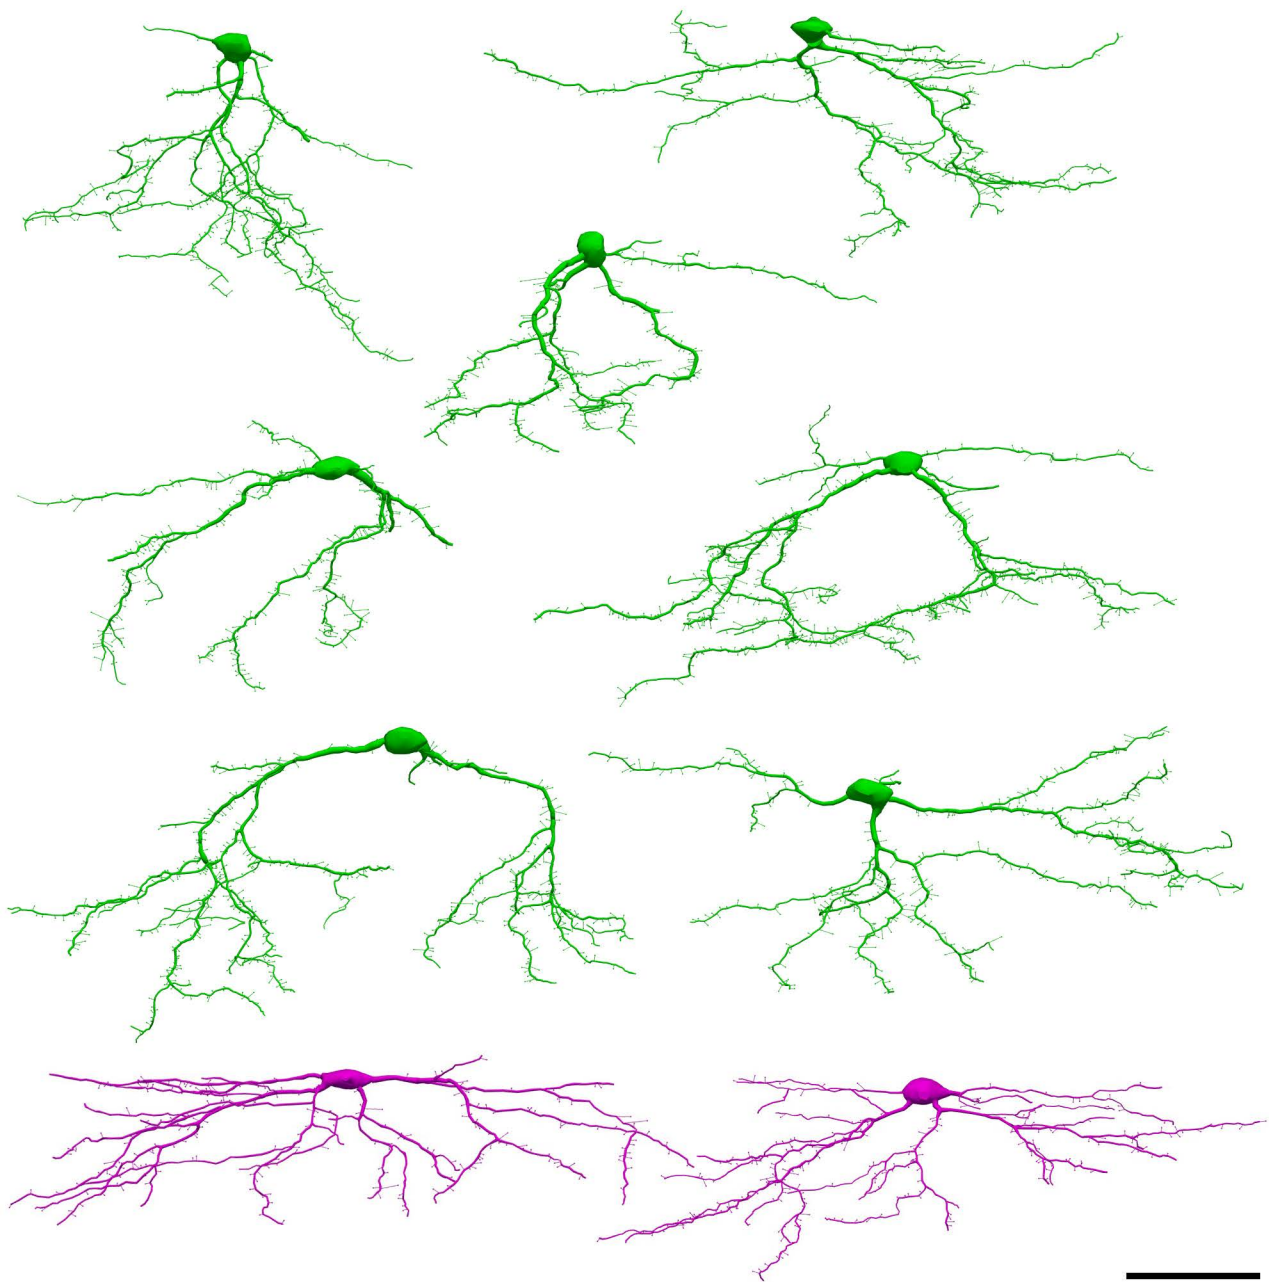

**Table S1** Viruses used in this study

|                                   |                     |                 |                 |                         |               | <b>Details of injection</b>             |               |
|-----------------------------------|---------------------|-----------------|-----------------|-------------------------|---------------|-----------------------------------------|---------------|
|                                   | <b>Construct(s)</b> | <b>Serotype</b> | <b>Promoter</b> | <b>Catalogue number</b> | <b>Source</b> | <b>Number of GCs</b>                    | <b>Volume</b> |
| <b>AAV.flex.eGFP</b>              | eGFP                | AAV8            | CAG             | v158-8                  | VVF Zurich    | $2.58 \times 10^8$                      | 300 nl        |
| <b>AAV-EF1a-BbTagBY (AAV-BB1)</b> | TagBFP, YFP         | AAV9            | hEF1a           | 45185                   | Addgene       | $7.55 \times 10^7$ – $3.02 \times 10^8$ | 500 nl        |
| <b>AAV-EF1a- BbChT (AAV-BB2)</b>  | mTFP, mCherry       | AAV9            | hEF1a           | 45186                   | Addgene       | $7.44 \times 10^7$ – $2.98 \times 10^8$ | 500 nl        |
| <b>AAV.FRT.mCherry</b>            | mCherry             | AAV2            | hSyn1           | V188-2                  | VVF Zurich    | $8.7 \times 10^8$                       | 300 nl        |

**Table S2** Antibodies used in this study

|             |            |                     |           |            |                 |
|-------------|------------|---------------------|-----------|------------|-----------------|
| GFP         | Chicken    | Abcam               | ab13970   | 1:1000     | RRID:AB_300798  |
| mCherry*    | rat        | Invitrogen          | M11217    | 1:1000     | RRID:AB_2536611 |
| PPTB        | Guinea pig | Kaneko et al (1998) |           | 1:50,000   | RRID:AB_2783015 |
| pro-NPFF    | Guinea pig | M Watanabe          |           | 0.83 µg/ml | RRID:AB_2783015 |
| Pro-CCK     | Rabbit     | M Watanabe          |           | 1:1000     | RRID:AB_2571674 |
| Neurotensin | Rabbit     | Immunostar          | 20072     | 1:5000     | RRID:AB_572254  |
| Pax2        | Rabbit     | Sigma               | HPA047704 | 1:200      | RRID:AB_2636861 |
| mTFP        | Rat        | Kerafast            | EMU103    | 1:500      |                 |
| TagRFP**    | Rabbit     | Ximbio              | 155266    | 1:500      |                 |
| NeuN        | Mouse      | Merck               | MAB377    | 1:500      | RRID:AB_2298772 |

\*The mCherry antibody also recognises tdTomato

\*\* The antibody against tagRFP also recognises tagBFP

## Supplementary figure legends

Fig S1 Expression of tdTom in other brain areas in NPF<sup>Cre</sup>;Ai9 mouse. **a,b** show axonal labelling for tdTomato (magenta) in the parabrachial area. The location of the superior cerebellar peduncle (marked with asterisks) can be seen in the dark field (DF) image in **b**. **c-g**: scattered tdTomato-positive cells (magenta) are present in several brain areas, including the caudatoputamen, superior colliculus, cerebellar cortex, neocortex and hippocampus. In all cases the sections were counterstained with DAPI (blue) to reveal cell nuclei. **a, b** are from a single confocal optical section, while **c** to **g** are from 5, 7, 7, 9, and 20 optical sections at 4  $\mu\text{m}$  z-separation. Scale bars: **a, b** = 500  $\mu\text{m}$ , **c-g** = 500  $\mu\text{m}$ .

Fig S2 Lack of Pax2 staining in NPF<sup>Cre</sup> cells. Pax2-immunostaining (blue) in a section from a NPF<sup>Cre</sup>;Ai9 mouse that had been injected with AAV.flex.GFP. Five cells that are tdTomato positive (red) are present in this field. Three of these (arrows) are also positive for GFP (green), and therefore appear orange or yellow in the merged image, while the other 2 (arrowheads) lack GFP. None of these cells are Pax2-immunoreactive. Images are maximum intensity projections of 3 confocal optical sections at 1  $\mu\text{m}$  z-spacing. Scale bar = 20  $\mu\text{m}$ .

Fig S3 The upper part of the figure shows 7 of the Brainbow-labelled NPF-immunoreactive cells (green) that were reconstructed with NeuroLucida for this study. For comparison, we also include 2 GRPR cells (magenta) that were examined as part of a previous study (Polgár et al, *Pain* **164**, 149-170, 2023). Note that the

positions of all dendritic spines are shown, but the sizes of spine heads and shapes of spine necks do not represent the actual sizes and shapes of these structures.
